# Supplementary material for: Preventing Risk and Promoting Young Children’s Mental, Emotional, and Behavioral Health in State Mental Health Systems
Source: Atypon-hosted journal article supplement (doi:10.1176/appi.ps.202000147), 2020-11-10
Supplement: appi.ps.202000147.ds001.pdf [file appi.ps.202000147.ds001.pdf]

**IMPLEMENTATION ISSUES IN PREVENTING RISK AND PROMOTING YOUNG CHILDREN’S MENTAL, EMOTIONAL, AND BEHAVIORAL HEALTH WITHIN STATE MENTAL HEALTH SYSTEMS**

| Coalition Building                                                                                                                                                                                                                                                                                                                                                                                                                                                                                                                                                                                                                                                          | Contractual Issues                                                                                                                                                                                                                                                                                                                                                                                                                                                                                                                                                                       |
|-----------------------------------------------------------------------------------------------------------------------------------------------------------------------------------------------------------------------------------------------------------------------------------------------------------------------------------------------------------------------------------------------------------------------------------------------------------------------------------------------------------------------------------------------------------------------------------------------------------------------------------------------------------------------------|------------------------------------------------------------------------------------------------------------------------------------------------------------------------------------------------------------------------------------------------------------------------------------------------------------------------------------------------------------------------------------------------------------------------------------------------------------------------------------------------------------------------------------------------------------------------------------------|
| <p style="text-align: center;"><b>Structure and Governance</b></p> <p><b>Leadership.</b> Already-established State <u>Early Childhood Advisory Councils</u> (from 2007 Head Start Reauthorization Act) could serve as leader of childhood MEB investment efforts.</p> <p><b>Integrator.</b> CT’s <u>Health Enhancement Communities</u> (HEC); each HEC charged with aligning and implementing prevention and health equity strategies in their communities</p> <p><b>Funders.</b> Define <i>what (i.e. money, staff, expertise)</i> each partners can contribute (e.g. in NYS, non-profit <u>United Hospital Fund</u> designed, staffed stakeholder engagement process)</p> | <p style="text-align: center;"><b>Timeframe for Return on Investment</b></p> <p>Connecticut’s establishment of Health Enhancement Communities (HEC)(i.e., geographic attribution) and pediatric health systems modernization (doubled investment in pediatric primary care) estimates a <u>10-year cost benchmark</u> for better managing the health of its child population and seeing returns on investment (see page 110 of HEC report).</p>                                                                                                                                          |
| <p style="text-align: center;"><b>Family and Community Engagement</b></p> <p><b>CA</b> and <b>WA</b> “accountable communities for health” initiatives held town halls/forums soliciting community feedback throughout design-implementation phases; family leaders placed in leadership roles in governance structures</p> <p><u>NYS’ Medicaid redesign efforts</u> engaged over 500 stakeholders to lay out the “roadmap” for transitioning to value-based Medicaid reimbursement.</p>                                                                                                                                                                                     | <p style="text-align: center;"><b>Measures and Accountability</b></p> <p><b>Population Level:</b> <u>Maryland (MD) using school readiness rates</u> as a population-level measure to gauge overall impact of investments; <u>Oregon</u> incentivizing kindergarten readiness goals through health care quality metrics, via Coordinated Care Organizations.</p> <p><b>Individual Level:</b> <u>MassHealth providers use Pediatric Symptom Checklist</u> to asses child’s functioning to determine whether an intervention was effective, and if on track to achieve school readiness</p> |
| <p style="text-align: center;"><b>Workforce Needs: Training and Development</b></p> <p><b>Parenting Programs:</b> WA state providers <u>trained and certified in Triple P</u> (Positive Parenting Program; Level 2 &amp;3) can bill Medicaid; CA is training Medi-Cal providers (online course) on parenting as a ‘treatment’ to Adverse Childhood Experiences; more intensive training planned</p> <p><b>Peer Support by Family Peer Advocates:</b> NYS training &amp; certifying family peer advocate workforce to improve engagement in and outcomes from children’s mental health services; <u>FPA services now billable under Medicaid</u></p>                         | <p>Oregon’s <u>Coordinated Care Organizations (CCO)</u> Connecticut’s Health Enhancement Communities (HEC)</p>                                                                                                                                                                                                                                                                                                                                                                                                                                                                           |
